# Supplementary material
Source: PubMed Central journal article supplement (PMC8302036)
Supplement: NIHMS1660262-supplement-1.pdf [file NIHMS1660262-supplement-1.pdf]

## Supplemental material

eTable 1: Baseline characteristics stratified by WMH

|                                                       | White Matter Hyperintensities |                 |      |                  |                 |      |                  |                 |      |
|-------------------------------------------------------|-------------------------------|-----------------|------|------------------|-----------------|------|------------------|-----------------|------|
|                                                       | None/mild                     |                 |      | Moderate         |                 |      | Severe           |                 |      |
|                                                       | Higher BP target              | Lower BP target | p    | Higher BP target | Lower BP target | p    | Higher BP target | Lower BP target | p    |
|                                                       | n=213                         | n=244           |      | n=208            | n=198           |      | n=208            | n=189           |      |
| <b>Demographics</b>                                   |                               |                 |      |                  |                 |      |                  |                 |      |
| Age (years, mean±SD)                                  | 71.91 (5.20)                  | 72.58 (5.38)    | 0.19 | 73.86 (5.33)     | 74.13 (6.41)    | 0.64 | 75.32 (6.52)     | 75.86 (5.87)    | 0.59 |
| Female (n, %)                                         | 146 (68.5)                    | 144 (59.0)      | 0.04 |                  | 111 (56.6)      | 0.27 | 116 (56.3)       | 89 (52.7)       | 0.55 |
| Race/ethnicity (n, %)                                 |                               |                 | 0.75 |                  |                 | 0.83 |                  |                 | 0.18 |
| White                                                 | 124 (58.2)                    | 133 (54.5)      |      | 118 (56.7)       | 113 (57.7)      |      | 106 (51.5)       | 99 (58.6)       |      |
| Hispanic                                              | 73 (34.3)                     | 88 (36.1)       |      | 65 (31.2)        | 63 (32.1)       |      | 67 (32.5)        | 52 (30.8)       |      |
| Black                                                 | 12 (5.6)                      | 19 (7.8)        |      | 21 (10.1)        | 15 (7.7)        |      | 26 (12.6)        | 17 (10.1)       |      |
| Other                                                 | 4 (1.9)                       | 4 (1.6)         |      | 4 (1.9)          | 5 (2.6)         |      | 7 (3.4)          | 1 (0.6)         |      |
| Education (n, %)                                      |                               |                 | 0.14 |                  |                 | 0.18 |                  |                 | 0.97 |
| 0-8 years                                             | 65 (30.5)                     | 93 (38.1)       |      | 72 (34.6)        | 71 (36.2)       |      | 74 (35.9)        | 59 (34.9)       |      |
| 9-12 years                                            | 80 (37.6)                     | 73 (29.9)       |      | 64 (30.8)        | 73 (37.2)       |      | 67 (32.5)        | 57 (33.7)       |      |
| >12 years                                             | 68 (31.9)                     | 78 (32.0)       |      | 72 (34.6)        | 52 (26.5)       |      | 65 (31.6)        | 53 (31.4)       |      |
| <b>Cardiovascular risk factors</b>                    |                               |                 |      |                  |                 |      |                  |                 |      |
| Blood pressure (mmHg, mean±SD)                        |                               |                 |      |                  |                 |      |                  |                 |      |
| Systolic                                              | 140.54 (17.99)                | 142.09 (17.45)  | 0.35 | 144.86 (19.19)   | 145.55 (19.38)  | 0.65 | 146.24 (17.82)   | 146.92 (21.86)  | 0.74 |
| Diastolic                                             | 75.73 (9.88)                  | 74.59 (9.36)    | 0.21 | 78.24 (10.22)    | 76.09 (10.55)   | 0.27 | 78.44 (10.37)    | 76.34 (10.09)   | 0.92 |
| Body-mass index (kg/m <sup>2</sup> , mean±SD)         | 28.08 (4.16)                  | 27.73 (4.61)    | 0.41 | 28.03 (5.81)     | 27.91 (7.37)    | 0.85 | 27.25 (4.95)     | 27.02 (4.52)    | 0.64 |
| History of hypertension (n, %)                        | 155 (72.8)                    | 178 (72.1)      | 0.96 | 154 (74.0)       | 158 (80.6)      | 0.15 | 175 (85.0)       | 134 (79.3)      | 0.20 |
| Diabetes mellitus (n, %)                              | 70 (32.9)                     | 80 (32.8)       | 1.00 | 63 (30.3)        | 77 (39.3)       | 0.07 | 59 (28.6)        | 57 (33.7)       | 0.34 |
| Previous stroke or TIA (n, %)                         | 18 (8.5)                      | 28 (11.5)       | 0.36 | 34 (16.3)        | 33 (16.8)       | 1.00 | 40 (19.4)        | 28 (16.6)       | 0.56 |
| History of ischemic heart disease                     | 28 (13.1)                     | 19 (7.8)        | 0.08 | 31 (14.9)        | 18 (9.2)        | 0.11 | 21 (10.2)        | 20 (11.8)       | 0.73 |
| Current smoking (n, %)                                | 24 (11.3)                     | 30 (12.3)       | 0.85 | 17 (8.2)         | 28 (14.3)       | 0.07 | 18 (8.7)         | 14 (8.3)        | 1.00 |
| CKD (eGFR < 60ml/min; n, %)                           | 42 (19.7)                     | 42 (17.2)       | 0.57 | 44 (21.2)        | 56 (28.6)       | 0.11 | 57 (27.7)        | 55 (32.5)       | 0.36 |
| <b>Medication</b>                                     |                               |                 |      |                  |                 |      |                  |                 |      |
| ACE inhibitors / AT2 antagonists                      | 130 (61.0)                    | 158 (64.8)      | 0.47 | 128 (61.5)       | 135 (68.9)      | 0.15 | 150 (72.8)       | 118 (69.8)      | 0.60 |
| Calcium-channel blockers                              | 43 (20.2)                     | 54 (22.1)       | 0.70 | 48 (23.1)        | 48 (24.5)       | 0.83 | 58 (28.2)        | 39 (23.1)       | 0.32 |
| Beta blockers                                         | 49 (23.0)                     | 50 (20.5)       | 0.59 | 43 (20.7)        | 44 (22.4)       | 0.75 | 55 (26.7)        | 49 (29.0)       | 0.71 |
| Diuretics                                             | 70 (32.9)                     | 71 (29.1)       | 0.44 | 77 (37.0)        | 68 (34.7)       | 0.70 | 77 (37.4)        | 57 (33.7)       | 0.53 |
| Other antihypertensive medications                    | 7 (3.3)                       | 17 (7.0)        | 0.12 | 25 (12.0)        | 15 (7.7)        | 0.19 | 17 (8.3)         | 17 (10.1)       | 0.67 |
| Statin (n, %)                                         | 144 (67.6)                    | 180 (85.6)      | 0.72 | 148 (71.2)       | 140 (71.4)      | 1.00 | 137 (66.5)       | 105 (62.1)      | 0.44 |
| <b>Modified Rankin stroke disability score (n, %)</b> |                               |                 |      |                  |                 |      |                  |                 |      |
|                                                       |                               |                 | 0.78 |                  |                 | 0.19 |                  |                 | 0.15 |
| Score = 0                                             | 40 (18.8)                     | 48 (19.7)       |      | 36 (17.3)        | 25 (12.8)       |      | 22 (10.7)        | 29 (17.2)       |      |
| Score = 1                                             | 115 (54.0)                    | 121 (49.6)      |      | 115 (55.3)       | 104 (53.1)      |      | 108 (52.4)       | 83 (49.1)       |      |
| Score = 2                                             | 38 (18.9)                     | 49 (20.1)       |      | 39 (18.8)        | 38 (19.4)       |      | 47 (22.8)        | 42 (24.9)       |      |
| Score = 3                                             | 22 (10.3)                     | 26 (10.7)       |      | 18 (8.7)         | 29 (14.8)       |      | 29 (14.1)        | 15 (8.9)        |      |

Abbreviations: BP, blood pressure; CKD, chronic kidney disease; CVD, cardiovascular disease; eGFR, estimated glomerular filtration rate; n, number; SD, standard deviation

eTable 2: Baseline characteristics stratified by ADL limitations

|                                                       | No limitations   |                 | p    | 1+ limitations   |                 | p    |
|-------------------------------------------------------|------------------|-----------------|------|------------------|-----------------|------|
|                                                       | Higher BP target | Lower BP target |      | Higher BP target | Lower BP target |      |
|                                                       | n=432            | n=390           |      | n=213            | n=228           |      |
| <b>Barthel Activities of Daily Living limitations</b> |                  |                 |      |                  |                 |      |
| <i>Demographics</i>                                   |                  |                 |      |                  |                 |      |
| Age (years, mean±SD)                                  | 72.98 (5.32)     | 73.80 (5.93)    | 0.04 | 75.06 (6.59)     | 74.12 (6.08)    | 0.12 |
| Female (n, %)                                         | 298 (68.5)       | 240 (61.5)      | 0.04 | 110 (51.6)       | 112 (49.1)      | 0.67 |
| Race/ethnicity (n, %)                                 |                  |                 | 0.31 |                  |                 | 0.30 |
| White                                                 | 261 (60.4)       | 260 (66.7)      |      | 100 (46.9)       | 92 (40.4)       |      |
| Hispanic                                              | 122 (28.2)       | 95 (24.4)       |      | 88 (41.3)        | 110 (48.2)      |      |
| Black                                                 | 40 (9.3)         | 28 (7.2)        |      | 19 (8.9)         | 23 (10.1)       |      |
| Other                                                 | 9 (2.1)          | 7 (1.8)         |      | 6 (2.8)          | 3 (1.3)         |      |
| Education (n, %)                                      |                  |                 | 0.89 |                  |                 | 0.35 |
| 0-8 years                                             | 118 (27.3)       | 106 (27.2)      |      | 96 (45.1)        | 118 (51.8)      |      |
| 9-12 years                                            | 154 (35.6)       | 145 (37.2)      |      | 65 (30.5)        | 64 (28.1)       |      |
| >12 years                                             | 160 (37.0)       | 139 (35.6)      |      | 52 (24.4)        | 46 (20.2)       |      |
| <i>Cardiovascular risk factors</i>                    |                  |                 |      |                  |                 |      |
| Blood pressure (mmHg, mean±SD)                        |                  |                 |      |                  |                 |      |
| Systolic                                              | 142.98 (17.80)   | 144.48 (18.96)  | 0.24 | 145.03 (19.29)   | 144.30 (19.89)  | 0.70 |
| Diastolic                                             | 76.23 (10.02)    | 75.69 (9.68)    | 0.44 | 76.26 (10.28)    | 74.48 (10.31)   | 0.07 |
| Body-mass index (kg/m <sup>2</sup> , mean±SD)         | 28.08 (5.07)     | 27.30 (4.47)    | 0.02 | 27.26 (4.81)     | 28.02 (7.11)    | 0.21 |
| History of hypertension (n, %)                        | 330 (76.4)       | 300 (76.9)      | 0.92 | 169 (79.3)       | 175 (76.8)      | 0.59 |
| Diabetes mellitus (n, %)                              | 119 (27.5)       | 117 (30.0)      | 0.48 | 75 (35.2)        | 100 (43.9)      | 0.08 |
| Previous stroke or TIA (n, %)                         | 65 (15.1)        | 53 (13.6)       | 0.62 | 30 (14.1)        | 38 (16.7)       | 0.54 |
| History of ischemic heart disease                     | 63 (14.6)        | 33 (8.5)        | 0.01 | 18 (8.5)         | 26 (11.4)       | 0.38 |
| Current smoking (n, %)                                | 42 (9.7)         | 45 (11.5)       | 0.46 | 17 (8.0)         | 28 (12.3)       | 0.18 |
| CKD (eGFR < 60ml/min; n, %)                           | 94 (21.8)        | 104 (26.7)      | 0.12 | 56 (26.3)        | 51 (22.4)       | 0.40 |
| <i>Medication</i>                                     |                  |                 |      |                  |                 |      |
| ACE inhibitors / AT2 antagonists                      | 273 (63.2)       | 261 (66.9)      | 0.30 | 147 (69.0)       | 156 (68.4)      | 0.98 |
| Calcium-channel blockers                              | 105 (24.3)       | 86 (22.1)       | 0.50 | 47 (22.1)        | 59 (25.9)       | 0.41 |
| Beta blockers                                         | 106 (24.5)       | 102 (26.2)      | 0.65 | 43 (20.2)        | 43 (18.9)       | 0.82 |
| Diuretics                                             | 153 (35.4)       | 145 (37.2)      | 0.65 | 77 (36.2)        | 54 (23.7)       | 0.01 |
| Other antihypertensive medications                    | 35 (8.1)         | 28 (7.2)        | 0.72 | 16 (7.5)         | 21 (9.2)        | 0.64 |
| Statin (n, %)                                         | 309 (71.5)       | 271 (69.5)      | 0.57 | 131 (61.5)       | 142 (62.3)      | 0.94 |
| <i>Modified Rankin stroke disability score (n, %)</i> |                  |                 |      |                  |                 |      |
|                                                       |                  |                 | 0.21 |                  |                 | 0.37 |
| Score = 0                                             | 91 (21.1)        | 102 (26.2)      |      | 10 (4.7)         | 4 (1.8)         |      |
| Score = 1                                             | 277 (64.1)       | 233 (59.7)      |      | 69 (32.4)        | 78 (34.2)       |      |
| Score = 2                                             | 58 (13.4)        | 53 (13.6)       |      | 71 (33.3)        | 77 (33.8)       |      |
| Score = 3                                             | 6 (1.4)          | 2 (0.5)         |      | 63 (29.6)        | 69 (30.3)       |      |

Abbreviations: BP, blood pressure; CKD, chronic kidney disease; CVD, cardiovascular disease; eGFR, estimated glomerular filtration rate; n, number; SD, standard deviation

*eTable 3: Medication use during follow-up by blood pressure treatment target*

|                                                                           | Lower (<130 mmHg) | Higher (130-149 mmHg) | P-value |
|---------------------------------------------------------------------------|-------------------|-----------------------|---------|
| <b>At 1 year after baseline (n, %)</b>                                    |                   |                       |         |
| ACE inhibitors / AT2 antagonists                                          | 353 (65)          | 349 (61)              | < 0.001 |
| Calcium-channel blockers                                                  | 235 (43)          | 167 (29)              | < 0.001 |
| Beta blockers                                                             | 151 (28)          | 128 (22)              | 0.02    |
| Diuretics                                                                 | 360 (67)          | 263 (46)              | < 0.001 |
| Other antihypertensive medications                                        | 74 (14)           | 52 (9)                | 0.03    |
| Statins                                                                   | 353 (65)          | 383 (67)              | 0.60    |
| Mean number of antihypertensive medications at 1 year after baseline (SD) | 2.0 (1.4)         | 1.5 (1.3)             | < 0.001 |
| <b>At last visit</b>                                                      |                   |                       |         |
| ACE inhibitors / AT2 antagonists                                          | 484 (78)          | 377 (58)              | < 0.001 |
| Calcium-channel blockers                                                  | 271 (44)          | 179 (28)              | < 0.001 |
| Beta blockers                                                             | 184 (30)          | 159 (25)              | 0.04    |
| Diuretics                                                                 | 382 (62)          | 268 (42)              | < 0.001 |
| Other antihypertensive medications                                        | 81 (13)           | 73 (11)               | 0.33    |
| Statins                                                                   | 407 (66)          | 430 (67)              | 0.76    |
| Mean number of antihypertensive medications at last visit (SD)            | 2.3 (1.2)         | 1.6 (1.4)             | < 0.001 |

Abbreviations: ACE, angiotensin converting enzyme; AT2, angiotensin 2; SD, standard deviation

eTable 4: Effect modification of WMH and disability on mean CASI Z-scores over time

|                    | N    | Predicted baseline CASI Z-score and change per year* |            |                 |            | Between-group difference | P for interaction** |                                |
|--------------------|------|------------------------------------------------------|------------|-----------------|------------|--------------------------|---------------------|--------------------------------|
|                    |      | Higher BP target                                     |            | Lower BP target |            |                          | Group x time        | Group x time x effect modifier |
|                    |      | Baseline                                             | Change/y   | Baseline        | Change/y   |                          |                     |                                |
| <b>Overall</b>     | 1227 | -0.66±0.05                                           | -0.01±0.01 | -0.72±0.05      | 0.00±0.01  | 0.01<br>(-0.03 to 0.04)  | 0.71                | -                              |
| <b>WMH ***</b>     |      |                                                      |            |                 |            |                          |                     |                                |
| No/mild WMH        | 443  | -0.39±0.09                                           | 0.03±0.02  | -0.55±0.09      | 0.01±0.02  | -0.02<br>(-0.08 to 0.04) | 0.58                |                                |
| Moderate WMH       | 391  | -0.62±0.09                                           | -0.03±0.02 | -0.75±0.10      | 0.02±0.02  | 0.04<br>(-0.02 to 0.11)  | 0.21                | 0.42                           |
| Severe WMH         | 366  | -1.04±0.09                                           | -0.02±0.03 | -0.92±0.10      | -0.02±0.03 | 0.00<br>(-0.07 to 0.07)  | 0.80                |                                |
| <b>Disability</b>  |      |                                                      |            |                 |            |                          |                     |                                |
| No ADL limitations | 794  | -0.42±0.06                                           | 0.00±0.02  | -0.44±0.07      | 0.00±0.02  | 0.00<br>(-0.04 to 0.05)  | 0.99                |                                |
| 1+ ADL limitation  | 433  | -1.15±0.09                                           | -0.01±0.02 | -1.18±0.09      | 0.01±0.02  | 0.02<br>(-0.05 to 0.08)  | 0.40                | 0.66                           |

Abbreviations: ADL, activities of daily living; BP, blood pressure; CASI, Cognitive Abilities Screening Instrument; N, number; SE, standard error; WMH, white matter hyperintensities; y, year

\* Mean±SE from linear mixed models adjusted for age, sex and race. Between-group difference is mean (95% confidence interval) difference in change/year for lower vs. higher BP treatment target.

\*\* Calculated from a two-way interaction (treatment group x time) and a three-way interaction (treatment group x effect modifier x time), using linear mixed model adjusted for age, sex and race.

\*\*\* WMH was missing for 27 participants (9 in lower BP target group, 18 in higher BP target group).

eTable 5: Sensitivity analyses for mean CASI Z-scores over time

|                                                  | N     | Predicted baseline CASI Z-score and change per year* |            |                 |            | Between-group difference | P for interaction ** |                                |  |
|--------------------------------------------------|-------|------------------------------------------------------|------------|-----------------|------------|--------------------------|----------------------|--------------------------------|--|
|                                                  |       | Higher BP target                                     |            | Lower BP target |            |                          | Group x time         | Group x time x effect modifier |  |
|                                                  |       | Baseline                                             | Change/y   | Baseline        | Change/y   |                          |                      |                                |  |
| <b>Hypertensive participants at baseline ***</b> | 1,172 | -0.66±0.05                                           | 0.00±0.01  | -0.72±0.06      | 0.00±0.01  | 0.01 (-0.03 to 0.04)     | 0.73                 | -                              |  |
| <b>WMH</b>                                       |       |                                                      |            |                 |            |                          |                      |                                |  |
| None/mild                                        | 419   | -0.37±0.09                                           | 0.03±0.02  | -0.56±0.09      | 0.01±0.02  | -0.02 (-0.08 to 0.05)    | 0.56                 |                                |  |
| Moderate                                         | 369   | -0.66±0.10                                           | -0.02±0.02 | -0.76±0.10      | 0.02±0.02  | 0.05 (-0.02 to 0.11)     | 0.18                 | 0.37                           |  |
| Severe                                           | 358   | -1.03±0.10                                           | -0.02±0.03 | -0.93±0.10      | -0.02±0.03 | 0.00 (-0.07 to 0.07)     | 0.75                 |                                |  |
| <b>Disability</b>                                |       |                                                      |            |                 |            |                          |                      |                                |  |
| No ADL limitations                               | 749   | -0.43±0.07                                           | 0.00±0.02  | -0.45±0.07      | 0.00±0.02  | 0.00 (-0.05 to 0.05)     | 0.97                 |                                |  |
| 1+ ADL limitation                                | 423   | -1.13±0.09                                           | 0.00±0.02  | -1.16±0.09      | 0.01±0.02  | 0.02 (-0.05 to 0.08)     | 0.41                 | 0.70                           |  |
| <b>Adjustment for baseline imbalances ****</b>   | 1,227 | -0.66±0.05                                           | -0.01±0.01 | -0.72±0.05      | 0.00±0.01  | 0.01 (-0.03 to 0.04)     | 0.71                 | -                              |  |
| <b>WMH</b>                                       |       |                                                      |            |                 |            |                          |                      |                                |  |
| None/mild                                        | 443   | -0.39±0.09                                           | 0.03±0.02  | -0.55±0.09      | 0.01±0.02  | -0.02 (-0.08 to 0.04)    | 0.58                 |                                |  |
| Moderate                                         | 391   | -0.61±0.09                                           | -0.03±0.02 | -0.75±0.10      | 0.02±0.02  | 0.04 (-0.02 to 0.10)     | 0.21                 | 0.42                           |  |
| Severe                                           | 366   | -1.04±0.09                                           | -0.02±0.03 | -0.91±0.10      | -0.02±0.03 | 0.00 (-0.07 to 0.07)     | 0.80                 |                                |  |
| <b>Disability</b>                                |       |                                                      |            |                 |            |                          |                      |                                |  |
| No ADL limitations                               | 794   | -0.42±0.06                                           | 0.00±0.02  | -0.44±0.07      | 0.00±0.02  | 0.00 (-0.04 to 0.05)     | 0.99                 |                                |  |
| 1+ ADL limitation                                | 433   | -1.15±0.09                                           | -0.01±0.02 | -1.18±0.09      | 0.01±0.02  | 0.02 (-0.05 to 0.08)     | 0.40                 | 0.66                           |  |

Abbreviations: ADL, activities of daily living; BP, blood pressure; CASI, Cognitive Abilities Screening Instrument; N, number; SE, standard error; WMH, white matter hyperintensities; y, year

\* Mean±SE from linear mixed models adjusted for age, sex and race (and for history of diabetes, history of ischemic disease, and baseline diastolic blood pressure in the analysis adjusting for baseline imbalances). Between-group difference is mean (95% confidence interval) difference in change/year for lower vs. higher BP treatment target.

\*\* Calculated from a two-way interaction (treatment group x time) and a three-way interaction (treatment group x effect modifier x time), using a linear mixed model.

\*\*\* Non-hypertensive participants without antihypertensive medication at baseline excluded.

\*\*\*\* Analysis was adjusted for age, sex, race, history of diabetes, history of ischemic disease, and baseline diastolic blood pressure.

eTable 6: Sensitivity analyses for incident MCI

|                                                 | Lower BP target |        | Higher BP target |        | HR (95% CI) *      | P-Value | P for interaction |
|-------------------------------------------------|-----------------|--------|------------------|--------|--------------------|---------|-------------------|
|                                                 | N               | Events | N                | Events |                    |         |                   |
| <b>Hypertensive participants at baseline **</b> | 272             | 84     | 277              | 96     | 0.87 (0.65 - 1.18) | 0.37    | -                 |
| <b>WMH</b>                                      |                 |        |                  |        |                    |         |                   |
| None/mild                                       | 117             | 33     | 113              | 40     | 0.83 (0.52 - 1.32) | 0.42    |                   |
| Moderate                                        | 81              | 23     | 83               | 30     | 0.84 (0.48 - 1.46) | 0.54    | 0.93              |
| Severe                                          | 70              | 26     | 67               | 21     | 1.03 (0.57 - 1.86) | 0.92    |                   |
| <b>Disability</b>                               |                 |        |                  |        |                    |         |                   |
| No ADL limitations                              | 194             | 56     | 203              | 66     | 0.95 (0.66 - 1.37) | 0.78    |                   |
| 1+ ADL limitation                               | 78              | 28     | 74               | 30     | 0.85 (0.49 - 1.44) | 0.54    | 0.52              |
| <b>Adjustment for baseline imbalances ***</b>   | 288             | 91     | 293              | 99     | 0.94 (0.70 - 1.25) | 0.65    | -                 |
| <b>WMH</b>                                      |                 |        |                  |        |                    |         |                   |
| None/mild                                       | 124             | 35     | 118              | 41     | 0.93 (0.58 - 1.49) | 0.77    |                   |
| Moderate                                        | 87              | 28     | 92               | 32     | 0.88 (0.52 - 1.49) | 0.64    | 0.89              |
| Severe                                          | 72              | 26     | 69               | 21     | 1.00 (0.55 - 1.84) | 0.99    |                   |
| <b>Disability</b>                               |                 |        |                  |        |                    |         |                   |
| No ADL limitations                              | 209             | 62     | 217              | 68     | 1.08 (0.75 - 1.54) | 0.68    |                   |
| 1+ ADL limitation                               | 79              | 29     | 76               | 31     | 0.95 (0.55 - 1.61) | 0.85    | 0.44              |

\* Lower vs. higher target. Analysis was adjusted for age, sex and race.

\*\* Non-hypertensive participants without antihypertensive medication at baseline excluded.

\*\*\* Analysis was adjusted for age, sex, race, history of diabetes, history of ischemic disease, and baseline diastolic blood pressure.

Abbreviations: ADL, activities of daily living; BP, blood pressure; CI, confidence interval; HR, hazard ratio; MCI, mild cognitive impairment; N, number; WMH, white matter hyperintensities

eTable 7: Sensitivity analyses for all stroke

|                                                 | Lower BP target |        | Higher BP target |        | HR (95% CI) *      | P-Value | P for interaction |
|-------------------------------------------------|-----------------|--------|------------------|--------|--------------------|---------|-------------------|
|                                                 | N               | Events | N                | Events |                    |         |                   |
| <b>Hypertensive participants at baseline **</b> | 593             | 55     | 613              | 66     | 0.89 (0.62 - 1.27) | 0.52    | -                 |
| <b>WMH</b>                                      |                 |        |                  |        |                    |         |                   |
| None/mild                                       | 232             | 22     | 200              | 9      | 2.33 (1.07 - 5.08) | 0.03    |                   |
| Moderate                                        | 187             | 15     | 194              | 22     | 0.74 (0.38 - 1.44) | 0.38    | 0.02              |
| Severe                                          | 166             | 17     | 201              | 34     | 0.57 (0.32 - 1.03) | 0.06    |                   |
| <b>Disability</b>                               |                 |        |                  |        |                    |         |                   |
| No ADL limitations                              | 369             | 30     | 407              | 39     | 0.91 (0.56 - 1.47) | 0.71    | 0.84              |
| 1+ ADL limitation                               | 224             | 25     | 206              | 27     | 0.87 (0.50 - 1.51) | 0.63    |                   |
| <b>Adjustment for baseline imbalances ***</b>   | 618             | 57     | 645              | 67     | 0.90 (0.63 - 1.28) | 0.56    | -                 |
| <b>WMH</b>                                      |                 |        |                  |        |                    |         |                   |
| None/mild                                       | 244             | 23     | 213              | 9      | 2.48 (1.14 - 5.41) | 0.02    |                   |
| Moderate                                        | 196             | 15     | 208              | 23     | 0.67 (0.35 - 1.30) | 0.23    | 0.01              |
| Severe                                          | 169             | 18     | 206              | 34     | 0.61 (0.34 - 1.09) | 0.10    |                   |
| <b>Disability</b>                               |                 |        |                  |        |                    |         |                   |
| No ADL limitations                              | 390             | 31     | 432              | 40     | 0.93 (0.58 - 1.50) | 0.78    | 0.85              |
| 1+ ADL limitation                               | 228             | 26     | 213              | 27     | 0.92 (0.53 - 1.59) | 0.76    |                   |

\* Lower vs. higher target. Analysis was adjusted for age, sex and race.

\*\* Non-hypertensive participants without antihypertensive medication at baseline excluded.

\*\*\* Analysis was adjusted for age, sex, race, history of diabetes, history of ischemic disease, and baseline diastolic blood pressure.

Abbreviations: ADL, activities of daily living; BP, blood pressure; CI, confidence interval; HR, hazard ratio; N, number; WMH, white matter hyperintensities





eFigure 1: Systolic blood pressure by treatment group over time

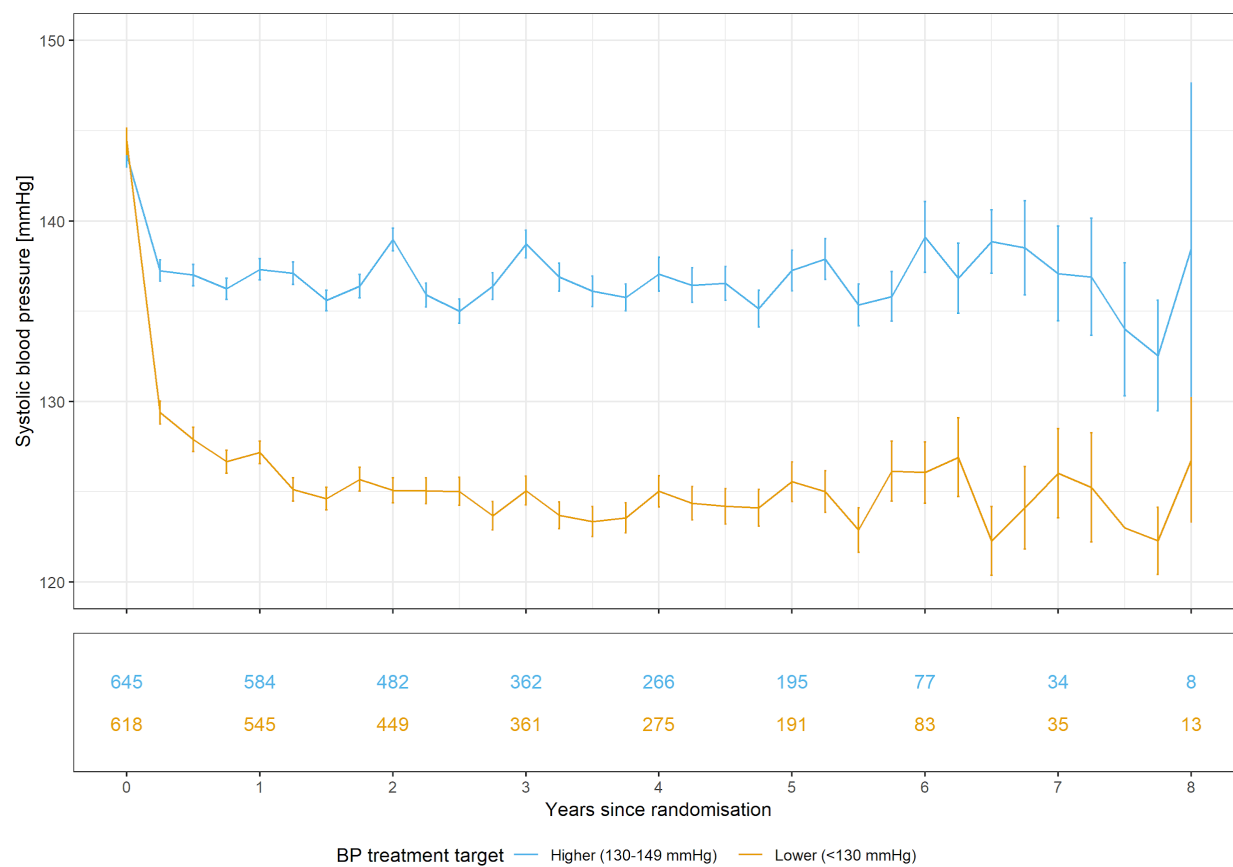

Data shown are mean systolic blood pressure; error bars indicate standard error.  
Abbreviations: BP, blood pressure
